# Supplementary material for: Physical, mechanical and energy characterization of wood pellets obtained from three common tropical species
Source: PeerJ. 2018 Sep 4;6:e5504. doi: 10.7717/peerj.5504 (PMC6128257; doi:10.7717/peerj.5504)
Supplement: Data S1 [file peerj-06-5504-s001.xlsx]

## Sheet: Mechanical properties
sp	no	lenght	density	compression N	Total Weight	Weight without pieces	N. Pieces	drop resistance Index (100*No. de aventadas/No. de piezas) ASTM method D441-86	weight retained
acacia	19	41.4	0.823324	78754	0.9636	0.5404	2	150	56.0814			Values
tenaza	7	33.1	0.955824	79776	0.8944	0.3611	3	100	40.3734		row labels	Average compression N	Standar deviation of compression N2	Average of drop resistance Index (100*No. de releases/No. of pieces) ASTM method D441-86	Standar deviation of drop resistance Index (100*No. of releases/No. of pieces) ASTM method D441-86 2	Average of weight retained	Standar deviation of weight retained 2
tenaza	10	36.5	0.958274	81179	0.9888	0.284	5	60	28.7217		acacia	53887.7	48669.1	160	73.4847	66.2747	22.5494
acacia	15	35.2	1.01587	86627	1.0109	0.5603	2	150	55.4259		Ebano	119662	35672	122.5	28.3945	61.7361	12.805
Ebano	16	39.2	1.02113	86422	1.1316	0.6248	2	150	55.2139		tenaza	88334.9	56921.9	116.75	28.8216	49.4892	13.2185
tenaza	5	35.4	1.03172	87783	1.0325	0.5335	3	100	51.6707		Total	87294.9	54912.1	133.083	52.0904	59.1667	18.2387
acacia	17	34.1	1.03464	89211	0.9974	0.6032	2	150	60.4772			4.47214
acacia	5	34.1	1.08422	89170	1.0452	0.9779	2	150	93.561
acacia	20	30.2	1.08591	87476	0.9271	0.9184	1	300	99.0616
Ebano	15	39.8	1.09755	86155	1.2349	0.9902	2	150	80.1846		Species	Compression test	Std	Standar error	Drop resistance	Std	Standar error	Weight retained	Std	Standar error
tenaza	14	30.3	1.10532	92560	0.9468	0.4133	3	100	43.6523		Acacia wrightii	538.877	486.691	108.879	160	73.4847	16.4395	66.2747	22.5494	5.04461
Ebano	13	38.3	1.12594	93670	1.2191	1.0274	2	150	84.2753		Ebenopsis ebano	1196.62	356.72	79.8032	122.5	28.3945	6.35225	61.7361	12.805	2.86466
acacia	3	37.2	1.12614	96368	1.1843	0.4704	3	100	39.7197		Havardia pallens	883.349	569.219	127.342	116.75	28.8216	6.4478	49.4892	13.2185	2.95715
acacia	4	35.3	1.13324	96296	1.1309	1.1182	1	300	98.877
tenaza	12	31.2	1.13704	98340	1.0029	0.5739	2	150	57.2241
tenaza	16	30.1	1.14005	65641	0.9701	0.7104	2	150	73.2296
Ebano	9	35.3	1.14988	142850	1.1475	0.5673	3	100	49.4379
acacia	13	30.1	1.15909	103710	0.9863	0.6973	2	150	70.6986
acacia	16	30.4	1.16929	83717	1.0049	1.0008	1	300	99.592
tenaza	20	25.9	1.17155	216490	0.8578	0.3096	3	100	36.0923
tenaza	11	33.5	1.17259	42328	1.1105	0.5149	3	100	46.3665
Ebano	6	35.4	1.1841	121590	1.185	0.8596	2	150	72.5401
Ebano	5	33.4	1.18437	144050	1.1183	0.5621	3	100	50.2638
Ebano	3	33.6	1.18658	164990	1.1271	0.6273	2	150	55.6561
tenaza	4	33.6	1.189	89393	1.1294	0.3925	3	100	34.753
tenaza	19	28.3	1.19806	157690	0.9585	0.545	2	150	56.8597
tenaza	9	32.6	1.19889	30525	1.1049	0.5367	3	100	48.5745
Ebano	11	38.8	1.20588	88270	1.3227	1.0046	2	150	75.9507
Ebano	20	32.5	1.20672	184090	1.1087	0.594	3	100	53.5763
Ebano	4	33.8	1.21179	116250	1.1579	0.574	3	100	49.5725
tenaza	18	28.9	1.22154	56012	0.998	0.557	2	150	55.8116
tenaza	3	32.5	1.22805	55863	1.1283	0.6284	2	150	55.6944
acacia	18	29.3	1.23927	7855	1.0265	1.0234	1	300	99.698
tenaza	15	29.4	1.24239	27873	1.0326	0.4538	3	100	43.9473
tenaza	6	28.9	1.2432	24244	1.0157	0.7682	2	150	75.6326
acacia	7	31.9	1.24893	172150	1.1263	0.6494	2	150	57.6578
Ebano	2	34.2	1.26092	90053	1.2191	0.6521	3	100	53.4903
acacia	10	37.1	1.27334	11133	1.3355	0.8195	3	100	61.3628
acacia	14	28.7	1.27615	58930	1.0354	0.4206	3	100	40.622
acacia	11	31.1	1.29175	6411	1.1357	0.8622	3	100	75.9179
tenaza	17	28.2	1.29514	127460	1.0325	0.3244	4	75	31.4189
tenaza	13	32.2	1.2976	47971	1.1812	0.7583	2	150	64.1974
tenaza	1	33.7	1.30744	17538	1.2456	0.4308	3	100	34.5857
Ebano	1	34.3	1.31221	102442	1.2724	0.7623	3	100	59.9104
Ebano	19	31.4	1.33032	103240	1.1809	0.8798	2	150	74.5025
Ebano	10	33.3	1.35417	103410	1.2748	0.8606	2	150	67.5086
acacia	8	31.3	1.36317	103684	1.2062	0.4707	3	100	39.0234
Ebano	8	33.7	1.37252	104420	1.3076	0.812	2	150	62.0985
Ebano	12	32.3	1.37342	108873	1.2541	0.8981	3	100	71.6131
Ebano	14	34.1	1.39864	119450	1.3483	0.9492	3	100	70.3998
acacia	9	31.7	1.4243	119414	1.2764	0.6036	3	100	47.2893
tenaza	8	30.4	1.4332	116430	1.2317	0.8146	2	150	66.1362
Ebano	18	34.2	1.44668	111840	1.3987	0.8934	4	75	63.8736
acacia	2	29.2	1.46569	127580	1.2099	0.5803	2	150	47.9626
Ebano	17	32.3	1.48633	123880	1.3572	0.3983	4	75	29.3472
acacia	6	27.9	1.49239	142578	1.1771	1.1027	2	150	93.6794
acacia	1	29.4	1.50396	151359	1.25	0.6357	3	100	50.856
tenaza	2	30.3	1.52537	164990	1.3066	0.5859	3	100	44.8416
Ebano	7	33.2	1.54097	168243	1.4463	0.7999	2	150	55.3066
acacia	12	29.9	1.59877	168380	1.3514	0.5126	3	100	37.931
		-0.170249	0.296307	1	0.173301	-0.115166	0.0995246	-0.153208	-0.198171

## Sheet: Physical properties
Species	No.	Weight	Diameter	Length	area (cm2)	Volume (cm3)	Density	Ratio length/diameter			Values
Acacia	1	1.06	6.01	29.18	28.3687	0.827799	1.2805	4.85524		Row labels	Average of diameter	Standar deviation of diameter 2	Average of length	Standar deviation of length 2	Average of density	Standar deviation of Density 2	Average of length/diameter ratio	Standar deviation of length/diameter ratio 2
Acacia	2	0.73	6.1	20.02	29.2247	0.585079	1.24769	3.28197		Acacia	6.0526	0.0509435	13.1694	5.80599	1.17569	0.102247	2.17789	0.965579
Acacia	3	0.67	6.17	19.76	29.8993	0.59081	1.13404	3.20259		Ebano	6.03	0.0926067	17.3684	11.3803	1.09909	0.161619	2.89251	1.91741
Acacia	4	0.24	6.08	7.71	29.0334	0.223848	1.07216	1.26809		Tenaza	6.0696	0.0878171	13.443	7.04849	1.1222	0.119846	2.22224	1.17696
Acacia	5	0.76	6.06	20.48	28.8427	0.590699	1.28661	3.37954		Total general	6.05073	0.0809782	14.6603	8.63983	1.13232	0.134196	2.43088	1.45082
Acacia	6	0.23	6.07	6.76	28.938	0.195621	1.17574	1.11367
Acacia	7	0.48	5.98	13.36	28.0862	0.375232	1.27921	2.23411
Acacia	8	0.61	6.03	17.54	28.5579	0.500905	1.2178	2.90879
Acacia	9	1.11	6.04	29.67	28.6526	0.850124	1.30569	4.91225
Acacia	10	0.83	6.02	24.29	28.4632	0.691371	1.20051	4.03488
Acacia	11	0.23	6.08	6.53	29.0334	0.189588	1.21316	1.07401
Acacia	12	0.27	6.14	8.06	29.6093	0.238651	1.13136	1.3127
Acacia	13	0.24	6.07	7.93	28.938	0.229478	1.04585	1.30643
Acacia	14	0.66	6.02	18.23	28.4632	0.518884	1.27196	3.02824
Acacia	15	0.35	6.08	9.6	29.0334	0.278721	1.25574	1.57895
Acacia	16	0.96	5.97	26.51	27.9924	0.742078	1.29367	4.44054
Acacia	17	0.62	6.09	17.44	29.129	0.50801	1.22045	2.86371					7.07107
Acacia	18	0.4	5.99	11.29	28.1802	0.318155	1.25725	1.88481			Diameter	Standar deviation	Estándar error (raiz de50)	Lenght	Standar deviation	Standar error	Density	Standar deviation	Standar error	Lenght/diameter	Standar deviation	Standar error
Acacia	19	0.38	6.01	11.51	28.3687	0.326524	1.16377	1.91514		Acacia	6.0526	0.0509435	0.00720457	13.1694	5.80599	0.821099	1.17569	0.102247	0.01446	2.17789	0.965579	0.136555
Acacia	20	0.24	6.01	7.93	28.3687	0.224964	1.06684	1.31947		Ebano	6.03	0.0926067	0.0130967	17.3684	11.3803	1.60943	1.09909	0.161619	0.0228566	2.89251	1.91741	0.271165
Acacia	21	0.78	6.02	21.11	28.4632	0.600858	1.29814	3.50664		Tenaza	6.0696	0.0878171	0.0124193	13.443	7.04849	0.996817	1.1222	0.119846	0.0169489	2.22224	1.17696	0.166449
Acacia	22	0.44	6.07	12.86	28.938	0.372142	1.18234	2.11862
Acacia	23	0.53	5.99	15.02	28.1802	0.423267	1.25216	2.50751
Acacia	24	0.41	6.04	12.69	28.6526	0.363602	1.12761	2.10099
Acacia	25	0.25	6.12	8.89	29.4167	0.261514	0.955971	1.45261
Acacia	26	0.4	6.05	11.46	28.7476	0.329448	1.21415	1.89421
Acacia	27	0.44	6.09	12.39	29.129	0.360908	1.21915	2.03448
Acacia	28	0.32	6.05	9.83	28.7476	0.282589	1.13239	1.62479		Species	Diameter	Lenght	Densiy
Acacia	29	0.26	6	8.14	28.2744	0.230154	1.12968	1.35667		Acacia wrightii	6.01±0.01	13.17±0.82	1.17±0.01
Acacia	30	0.35	6.04	11.28	28.6526	0.323202	1.08291	1.86755		Ebenopsis ebano	6.03±0.01	17.37±1.61	1.09±0.02
Acacia	31	0.3	5.92	9.5	27.5254	0.261492	1.14726	1.60473		Havardia pallens	6.06±0.01	13.44±0.99	1.60±0.47
Acacia	32	0.35	6.09	10.58	29.129	0.308185	1.13568	1.73727
Acacia	33	0.51	6.09	13.56	29.129	0.394989	1.29117	2.2266
Acacia	34	0.49	6.03	15.4	28.5579	0.439791	1.11417	2.5539
Acacia	35	0.41	6.09	11.46	29.129	0.333818	1.22821	1.88177
Acacia	36	0.58	6.08	16.4	29.0334	0.476148	1.21811	2.69737
Acacia	37	0.62	6.03	16.74	28.5579	0.478058	1.29691	2.77612
Acacia	38	0.48	6.08	13.07	29.0334	0.379467	1.26493	2.14967
Acacia	39	0.15	6.1	5.45	29.2247	0.159275	0.941769	0.893443
Acacia	40	0.35	6.05	10.41	28.7476	0.299263	1.16954	1.72066
Acacia	41	0.34	6.07	9.09	28.938	0.263046	1.29255	1.49753
Acacia	42	0.37	5.93	11.24	27.6185	0.310432	1.19189	1.89545
Acacia	43	0.59	5.99	16.7	28.1802	0.47061	1.25369	2.78798
Acacia	44	0.26	6.01	10.81	28.3687	0.306666	0.847828	1.79867
Acacia	45	0.3	6.09	8.79	29.129	0.256044	1.17167	1.44335
Acacia	46	0.23	6.07	8.03	28.938	0.232372	0.989792	1.3229
Acacia	47	0.22	6.1	6.67	29.2247	0.194929	1.12862	1.09344
Acacia	48	0.2	6.08	6.82	29.0334	0.198008	1.01006	1.12171
Acacia	49	0.32	6.09	9.35	29.129	0.272356	1.17493	1.5353
Acacia	50	0.39	6.15	10.93	29.7058	0.324684	1.20117	1.77724
Ebano	1	1.15	5.99	33.39	28.1802	0.940938	1.22218	5.57429
Ebano	2	0.25	6	7.51	28.2744	0.212341	1.17735	1.25167
Ebano	3	0.35	6.04	14.63	28.6526	0.419188	0.834947	2.42219
Ebano	4	1.35	6	38.22	28.2744	1.08065	1.24925	6.37
Ebano	5	0.23	6.15	7.78	29.7058	0.231111	0.995193	1.26504
Ebano	6	0.39	6.03	12.42	28.5579	0.354689	1.09956	2.0597
Ebano	7	0.93	6.02	25.11	28.4632	0.714711	1.30122	4.1711
Ebano	8	0.12	6.03	3.69	28.5579	0.105378	1.13875	0.61194
Ebano	9	0.35	6.03	10.85	28.5579	0.309853	1.12957	1.79934
Ebano	10	0.55	6.03	17.25	28.5579	0.492623	1.11647	2.8607
Ebano	11	0.11	5.99	4.54	28.1802	0.127938	0.85979	0.75793
Ebano	12	1.43	5.47	38.27	23.4999	0.89934	1.59005	6.99634
Ebano	13	0.16	6.01	8.67	28.3687	0.245957	0.650521	1.4426
Ebano	14	0.79	6	22.86	28.2744	0.646353	1.22224	3.81
Ebano	15	0.27	6.04	10.07	28.6526	0.288532	0.935771	1.66722
Ebano	16	0.13	6.08	4.74	29.0334	0.137618	0.944641	0.779605
Ebano	17	0.79	6.12	23.04	29.4167	0.67776	1.1656	3.76471
Ebano	18	0.99	6.04	27.06	28.6526	0.775341	1.27686	4.48013
Ebano	19	0.3	6.07	9.81	28.938	0.283882	1.05678	1.61614
Ebano	20	0.43	6.05	12.99	28.7476	0.373431	1.15148	2.14711
Ebano	21	1.41	6.03	38.68	28.5579	1.10462	1.27646	6.41459
Ebano	22	0.14	6.15	5.11	29.7058	0.151797	0.922287	0.830894
Ebano	23	0.89	5.94	23.72	27.7117	0.657322	1.35398	3.99327
Ebano	24	0.44	6.02	13.54	28.4632	0.385392	1.1417	2.24917
Ebano	25	1.13	6.03	32.26	28.5579	0.921276	1.22656	5.34992
Ebano	26	0.34	6.05	12.22	28.7476	0.351296	0.967846	2.01983
Ebano	27	0.18	6.05	6.23	28.7476	0.179098	1.00504	1.02975
Ebano	28	1.04	6.06	29.42	28.8427	0.848553	1.22562	4.85479
Ebano	29	0.35	6.07	11.22	28.938	0.324684	1.07797	1.84843
Ebano	30	0.19	6.16	6.2	29.8025	0.184775	1.02828	1.00649
Ebano	31	1.21	6.01	35.67	28.3687	1.01191	1.19576	5.93511
Ebano	32	1.17	5.98	34.69	28.0862	0.974311	1.20085	5.801
Ebano	33	0.27	6.05	9.57	28.7476	0.275115	0.981409	1.58182
Ebano	34	0.34	6.03	10.03	28.5579	0.286435	1.187	1.66335
Ebano	35	0.17	6.12	5.9	29.4167	0.173558	0.979497	0.964052
Ebano	36	0.3	6.02	10.58	28.4632	0.301141	0.996212	1.75748
Ebano	37	0.94	6.02	26.14	28.4632	0.744028	1.26339	4.34219
Ebano	38	0.29	6.01	11.1	28.3687	0.314893	0.920948	1.84692
Ebano	39	0.21	5.94	8.71	27.7117	0.241369	0.870036	1.46633
Ebano	40	1.25	6	36.68	28.2744	1.0371	1.20528	6.11333
Ebano	41	0.13	6.11	5.07	29.3206	0.148656	0.874505	0.829787
Ebano	42	0.32	6.05	9.53	28.7476	0.273965	1.16803	1.57521
Ebano	43	1.1	6.05	33.51	28.7476	0.963332	1.14187	5.53884
Ebano	44	0.23	6.08	7.02	29.0334	0.203815	1.12848	1.15461
Ebano	45	0.23	6.01	7.11	28.3687	0.201702	1.1403	1.18303
Ebano	46	1.36	6.08	38.37	29.0334	1.11401	1.22081	6.31086
Ebano	47	0.46	6	15.18	28.2744	0.429205	1.07175	2.53
Ebano	48	0.98	6.07	27.99	28.938	0.809974	1.20992	4.6112
Ebano	49	0.23	6.08	8.96	29.0334	0.260139	0.884141	1.47368
Ebano	50	0.42	6.04	15.11	28.6526	0.432942	0.970108	2.50166
Tenaza	1	0.08	6.13	3.13	29.5129	0.0923754	0.866032	0.510604
Tenaza	2	0.25	6.05	8.43	28.7476	0.242342	1.0316	1.39339
Tenaza	3	0.82	6	23.11	28.2744	0.653421	1.25493	3.85167
Tenaza	4	0.25	6.03	8.94	28.5579	0.255307	0.979213	1.48259
Tenaza	5	1.17	6	32.92	28.2744	0.930793	1.25699	5.48667
Tenaza	6	0.2	6.07	6.72	28.938	0.194463	1.02847	1.10708
Tenaza	7	0.84	6	24.26	28.2744	0.685937	1.2246	4.04333
Tenaza	8	0.41	6	11.94	28.2744	0.337596	1.21447	1.99
Tenaza	9	0.13	6.19	4.58	30.0935	0.137828	0.943204	0.739903
Tenaza	10	0.88	5.98	25.18	28.0862	0.707211	1.24432	4.2107
Tenaza	11	0.28	6.19	7.97	30.0935	0.239845	1.16742	1.28756
Tenaza	12	0.47	5.95	13.87	27.8051	0.385657	1.2187	2.33109
Tenaza	13	0.91	6.03	25.17	28.5579	0.718801	1.266	4.17413
Tenaza	14	0.43	6.1	12.7	29.2247	0.371154	1.15855	2.08197
Tenaza	15	0.36	6.01	11.22	28.3687	0.318297	1.13102	1.86689
Tenaza	16	0.62	6.12	18.15	29.4167	0.533913	1.16124	2.96569
Tenaza	17	0.41	6.05	11.92	28.7476	0.342671	1.19648	1.97025
Tenaza	18	0.32	6.08	11.82	29.0334	0.343175	0.932469	1.94408
Tenaza	19	0.54	6.11	14.99	29.3206	0.439516	1.22862	2.45336
Tenaza	20	0.78	5.97	23.94	27.9924	0.670137	1.16394	4.01005
Tenaza	21	0.44	6.01	13.95	28.3687	0.395744	1.11183	2.32113
Tenaza	22	0.23	6.18	7.02	29.9963	0.210574	1.09225	1.13592
Tenaza	23	0.8	6.03	22.64	28.5579	0.64655	1.23734	3.75456
Tenaza	24	0.81	6.06	24.45	28.8427	0.705204	1.1486	4.03465
Tenaza	25	0.38	6.04	11.66	28.6526	0.33409	1.13742	1.93046
Tenaza	26	0.87	6.02	23.96	28.4632	0.681979	1.2757	3.98007
Tenaza	27	0.26	6.32	8.25	31.3708	0.258809	1.0046	1.30538
Tenaza	28	0.36	6.03	11.29	28.5579	0.322418	1.11656	1.87231
Tenaza	29	0.21	6.23	6.26	30.4837	0.190828	1.10047	1.00482
Tenaza	30	0.73	5.99	20.81	28.1802	0.586431	1.24482	3.47412
Tenaza	31	0.47	6	13.64	28.2744	0.385663	1.21868	2.27333
Tenaza	32	0.86	6.18	22.76	29.9963	0.682716	1.25967	3.68285
Tenaza	33	0.2	6.29	7.28	31.0736	0.226216	0.88411	1.15739
Tenaza	34	0.55	6.03	15.4	28.5579	0.439791	1.25059	2.5539
Tenaza	35	0.21	6.04	6.76	28.6526	0.193692	1.0842	1.11921
Tenaza	36	0.43	6.23	13.43	30.4837	0.409395	1.05033	2.1557
Tenaza	37	0.27	6.03	9	28.5579	0.257021	1.0505	1.49254
Tenaza	38	0.35	6	11.02	28.2744	0.311584	1.12329	1.83667
Tenaza	39	0.37	6.01	11.06	28.3687	0.313758	1.17925	1.84027
Tenaza	40	0.29	6.01	9.32	28.3687	0.264397	1.09684	1.55075
Tenaza	41	0.77	6	21.74	28.2744	0.614685	1.25267	3.62333
Tenaza	42	0.13	6.28	4.42	30.9749	0.136909	0.949535	0.703822
Tenaza	43	0.33	6.07	9.34	28.938	0.270281	1.22095	1.53871
Tenaza	44	0.5	6.01	14.63	28.3687	0.415034	1.20472	2.43428
Tenaza	45	0.16	6.01	5.56	28.3687	0.15773	1.01439	0.925125
Tenaza	46	0.53	6.08	15.62	29.0334	0.453502	1.16868	2.56908
Tenaza	47	0.13	6.01	5.57	28.3687	0.158014	0.822713	0.926789
Tenaza	48	0.52	6.05	14.61	28.7476	0.420002	1.23809	2.41488
Tenaza	49	0.14	6.13	5.01	29.5129	0.14786	0.946844	0.817292
Tenaza	50	0.13	6.05	4.73	28.7476	0.135976	0.95605	0.781818

## Sheet: Proximates analyzes
Species	Samples (1…5)	Moisture content	volatile matter	Ash	Fixed carbon	HHV= 354.3FC + 170.8 VM	t_m.c.	t_v.m.	t_ash	t_f.c.
Ebano	1	4.87922	73.1396	3.0638	18.9174	19.1947	1.03009	0.866273	1.24103	1.17494
Ebano	2	4.93537	72.6823	2.4912	19.8911	19.4616	1.02696	0.870121	1.24333	1.1707
Ebano	3	4.05594	70.9184	2.00958	23.0161	20.2675	1.07386	0.884566	1.24527	1.15696
Acacia	1	6.44022	76.8662	3.15496	13.5386	17.9255	0.933302	0.833097	1.24066	1.19791
Acacia	2	7.07856	76.9632	3.64377	12.3145	17.5083	0.885629	0.832185	1.23869	1.20305
Acacia	5	6.69875	75.9708	2.85469	14.4757	18.1046	0.914744	0.841387	1.24187	1.19396
Tenaza	1	6.15458	78.6731	3.03444	12.1379	17.7378	0.952801	0.81566	1.24115	1.20379
Tenaza	2	6.24906	79.971	1.59523	12.1847	17.9761	0.94646	0.802486	1.24693	1.2036
Tenaza	3	6.13445	79.4963	2.59606	11.7732	17.7492	0.954139	0.807372	1.24291	1.20532
			Values
		Row labels	Average MC	Standar deviation MC 2	Average Volatile matter	Standar deviation VM 2	Average of ash	Standar deviation of ash2	Average of Fixed carbon	Standar deviation of FC 2	Average of HHV= 354.3FC + 170.8 VM	Standar deviation of HHV= 354.3FC + 170.8 VM2
		Acacia	6.73918	0.262163	76.6001	0.446688	3.2178	0.325193	13.443	0.884905	17.8461	0.249794
		Ebano	4.62351	0.401985	72.2468	0.957692	2.52153	0.430919	20.6082	1.74844	19.6412	0.456022
		Tenaza	6.17936	0.0499619	79.3801	0.536189	2.40858	0.602326	12.0319	0.183944	17.821	0.109737
		Total general	5.84735	0.937405	76.0757	3.01436	2.71597	0.588323	15.361	3.92295	18.4361	0.905741
			Moisture content			Volatile matter			Ash			Fixed carbon			Higher heating values
		Row labels	Average	Standar deviation	Standar error	Average	Standar deviation	Standar error	Average	Standar deviation	Standar error	Average	Standar deviation	Standar error	Average	Standar deviation	Standar error
		Acacia wrightii	6.73918	0.262163	0.15136	76.6001	0.446688	0.257895	3.2178	0.325193	0.18775	13.443	0.884905	0.5109	17.8461	0.249794	0.144219
		Ebenopsis ebano	4.62351	0.401985	0.232086	72.2468	0.957692	0.552924	2.52153	0.430919	0.248791	20.6082	1.74844	1.00946	19.6412	0.456022	0.263285
		Havardia pallens	6.17936	0.0499619	0.0288455	79.3801	0.536189	0.309569	2.40858	0.602326	0.347753	12.0319	0.183944	0.1062	17.821	0.109737	0.0633569
